# Supplementary material for: Systematic review of the scientific evidence of the pulmonary carcinogenicity of talc
Source: Front Public Health. 2022 Oct 11;10:989111. doi: 10.3389/fpubh.2022.989111 (PMC9593030; doi:10.3389/fpubh.2022.989111)
Supplement: Supplementary file 3 [file Table_3.xlsx]

## Sheet: S.3 Respiratory Cohort
Supplementary Table S.3: Full Data Extraction for Talc and Respiratory Cancer Cohort Studies
First Author	Publication Year	Full Citation	Study Location/Country	Study Design	Number of Participants and Follow-up Period	Study Participation/Inclusion Criteria	Site-Specific Cancer	Stratification	Type of Risk Estimate	No. Observed Cases	No. Expected Cases	Risk Estimate (95% CI)	Number of Mesotheliomas observed (if no risk estimates for mesothelioma presented)
Kleinfeld	1967	Kleinfeld, M., Messite, J., Kooyman, O., & Zaki, M. H. (1967). Mortality among talc miners and millers in New York State. Archives of Environmental Health: An International Journal, 14(5), 663-667.	Upstate New York, USA	Proportionate mortality	220 talc workers followed for cause of death from 1940 to 1965	All talc miners and millers employed in 1940 who had 15 or more years of exposure to talc dust	Lung and Pleura	Age Group: < 40	Proportional Mortality	0	N/A	N/A	One case of peritoneal mesothelioma observed. No additional information provided.
								Age Group: 40-59		5.3	5.5	NR; difference between observed and theoretical values were not statistically significant.
								Age Group: 60-79		17	3.9	NR; difference between observed and theoretical values were statistically significant (p = <0.01).
								Age Group: 80+		0	N/A	N/A
								Total		11	3.2	NR; difference between observed and theoretical values were statistically significant (p = <0.01).
							GI and Peritoneum	Age Group: < 40		0	N/A	N/A
								Age Group: 40-59		5.3	5.5	NR; difference between observed and theoretical values were not statistically significant.
								Age Group: 60-79		8.5	6.9	NR; difference between observed and theoretical values were not statistically significant.
								Age Group: 80+		25	4.3	NR
								Total		7.7	5.3	NR; difference between observed and theoretical values were not statistically significant.
Kleinfeld	1974	Kleinfeld, M., Messite, J., & Zaki, M. H. (1974). Mortality experiences among talc workers: a follow-up study. Journal of Occupational and Environmental Medicine, 16(5), 345-349.	Upstate New York, USA	Proportionate mortality	260 talc workers followed for cause of death from 1940 to 1969	All talc miners and millers employed in 1940 who had 15 or more years of exposure to talc dust as well as those who achieved a minimum of 15 years of exposure to commerical talc between 1940 and 1969.	Lung and Pleura	Year: 1940-1944	Proportional Mortality	0	2	NR	One case of peritoneal mesothelioma observed. No additional information provided.
								Year: 1945-1949		11.7	3.1	NR
								Year: 1950-1954		12.5	4.3	NR; difference between observed and expected was statistically significant (p<0.01)
								Year: 1955-1959		20	5.7	NR
								Year: 1960-1964		10.7	6.7	NR; difference between observed and expected was not statistically significant (p>0.05)
								Year: 1965-1969		8.7	7.7	NR; difference between observed and expected was not statistically significant (p>0.05)
								Total				NR; stated that the difference between observed and expected cases was not statistically significant
							GI and Peritoneum	Year: 1940-1944		14.3	7.8	NR; stated that the difference between observed and expected cases was not statistically significant
								Year: 1945-1949		5.8	7.8	NR; stated that the difference between observed and expected cases was not statistically significant
								Year: 1950-1954		12.5	7.1	NR; stated that the difference between observed and expected cases was not statistically significant
								Year: 1955-1959		12	6.7	NR; stated that the difference between observed and expected cases was not statistically significant
								Year: 1960-1964		3.6	6.3	NR; stated that the difference between observed and expected cases was not statistically significant
								Year: 1965-1969		9.5	6.1	NR; stated that the difference between observed and expected cases was not statistically significant
								Total				NR; stated that the difference between observed and expected cases was not statistically significant
Dement	1980	Dement, J. M. (1980). Occupational exposure to talc containing asbestos: Morbidity, mortality, and environmental studies of miners and millers. US Department of Health, Education, and Welfare, Public Health Service, Center for Disease Control, National Institute for Occupational Safety and Health.	Upstate New York, USA	Retrospective Cohort Mortality	398 talc workers followed for cause of death from 1947 to 1975.	White males employed at one mine and mill in Gouverneur Talc District initially employed sometime between January 1, 1947 and December 31, 1959.	Malignant Neoplasm- Respiratory System	Overall	SMR	10	3.5	2.9 (p < 0.01)	One case of peritoneal mesothelioma observed. No additional information provided.
							Malignant Neoplasm- Bronchogenic			9	3.3	2.7 (p < 0.05)
Stille	1982	Stille, W. T., & Tabershaw, I. R. (1982). The mortality experience of upstate New York talc workers. J. Occup. Med., 24(6), 480-484.	Upstate New York, USA	Retrospective Cohort Mortality	655 talc workers followed for cause of death from 1948 to 1978.	White male talc workers employed at one talc mine and mill (TMX) in upper New York State employed between 1948 and December 31, 1977.	Lung	Overall	SMR	10	6.4	1.57 (NR; p > 0.05	Mesothelioma not discussed.
								Workers with known prior employment before work at TMX		8	3.7	2.14 (NR; p > 0.05)
								Workers with no known prior employment before work at TMX		2	2.6	0.76 (NR; p > 0.05)
Lamm	1988	Lamm, S. H., Levine, M. S., Starr, J. A., & Tirey, S. L. (1988). Analysis of excess lung cancer risk en short-term employees. American journal of epidemiology, 127(6), 1202-1209.	Upstate New York, USA	Retrospective Cohort Mortality	705 talc workers followed for cause of death from 1947 to 1978.	White male talc workers employed at one talc mine and mill (TMX) in upper New York State employed between 1947 and December 31, 1977.	Lung	Total Cohort	SMR	12	5	2.4 (1.24-4.19) p < 0.05	Authors noted that an electrician at the plant with 20 years of previous employment as a miner, miller, or in construction died from mesothelioma 15 years after being hired at this plant.
								Workers employed one year or more		6	3.1	1.93 (0.71-4.20) p > 0.05
								Workers employed less than one year		6	1.9	3.17 (NR) p < 0.05
								Workers with prior employment in job with lung cancer risk		9	2.9	3.16 (NR) p < 0.05
								Workers with no prior employment in job with lung cancer risk		1	0.9	1.17 (NR) p > 0.05
								Duration of Employment and Work History Classifcation: Less than one year and prior risk		3	0.9	3.33 p > 0.05
								Duration of Employment and Work History Classifcation: Less than one year and no prior risk		1	0.4	2.86 p > 0.05
								Duration of Employment and Work History Classifcation: One year or more and prior risk		6	2	3.08 p < 0.05
								Duration of Employment and Work History Classifcation: One year or more and no prior risk		0	0.5	NA
Brown	1990	Brown, D. P. (1990). Health Hazard Evaluation Report HETA 90-390-2065, MHETA 86-012-2065: RT Vanderbilt Company, Gouverneur, New York (No. 90). Department of Health and Human Services, Public Health Service, Centers for Disease Control, National Institute for Occupational Safety and Health.	Upstate New York, USA	Retrospective Cohort Mortality	710 talc workers followed for cause of death from 1947 to 1983.	White male talc workers employed at one talc mine and mill in New York employed at any time for at least one day between 1947 and 1978.	Lung	Total Cohort	SMR	17	8.2	2.07 (1.20-3.31) p < 0.01	No mention of mesothelioma in the study.
								Duration of employment: 0 - < 1		8	3.5	2.29 (NR)
								Duration of employment: 1-9		4	2.4	1.67 (NR)
								Duration of employment: 10-19		3	1.2	2.50 (NR)
								Duration of employment: 20-36		2	1.1	1.82 (NR)
								Years since date of hire: 0 - <10		1	1.2	0.83 (NR)
								Years since date of hire: 10-19		3	2	1.50 (NR)
								Years since date of hire: 20-36		13	5	2.60 (1.37-4.41)
								Workers with less than one year of employment		8	3.6	2.22 (0.96-4.38)
								Workers with greater than one year of employment		9	4.6	1.96 (0.89-3.69)
Honda	2002	Honda, Y., Beall, C., Delzell, E., Oestenstad, K., Brill, I., & Matthews, R. (2002). Mortality among workers at a talc mining and milling facility. Annals of Occupational Hygiene, 46(7), 575-585.	Upstate New York, USA	Retrospective Cohort Mortality	809 talc workers followed for cause of death from 1950 to 1989.	White male talc workers employed at one talc mine and mill in New York employed for at least one day between 1948 and 1989 and known to have been alive in or after 1950.	Lung	Total Cohort	SMR	31	13	2.32 (1.57-3.29)	Two deaths from mesothelioma observed. One of the deaths worked at the talc facility for 15 years and died 15 years after starting working at the site. He previously worked for 16 years as a carpenter and millwright, eight years as a lead miner, and five years as a repairman in a milk plant. The second mesothelioma death occured in a worker with only brief employment at the facility as a draftsma…
								Hired before 1955		28	9.8	2.86 (1.90-4.14)
								Hired after 1955		3	3.6	0.83 (0.17-2.42)
								<20 years since hire, <5 years worked		3	2.4	1.26 (0.26-3.70)
								<20 years since hire, 5+ years worked		2	1.6	1.26 (0.15-4.54)
								20+ years since hire, <5 years worked		19	5.8	3.31 (1.99-5.16
								20+ years since hire, 5+ years worked		7	3.7	1.90 (0.76-3.92)
								Work Area - Mills		7	5.5	1.28 (0.51-2.63)
								Work Area - Mines		18	4.6	3.94 (2.33-6.22)
								Work Area - Minimal Exposure		3	3.9	0.77 (0.15-2.24)
								Work Area - No Exposure		3	1.1	2.81 (0.58-8.21)
								<20 years since hire, <5 years worked	RR	3	2.4	1.0 (ref)
								<20 years since hire, 5+ years worked		2	1.6	1.0 (0.2–5.9)
								20+ years since hire, <5 years worked		19	5.8	3.0 (0.7–11.8)
								20+ years since hire, 5+ years worked		7	3.7	1.8 (0.4–8.1)
								Cumulative Respirable Dust Exposure (mg/m3) - 0 - <95.1 (referent group)		11	N/A	N/A
								Cumulative Respirable Dust Exposure (mg/m3) - 95.1- <987		9	N/A	0.8 (0.3-1.9)
								Cumulative Respirable Dust Exposure (mg/m3) - 987+		9	N/A	0.5 (0.2-1.3)
Selevan	1979	Selevan, S. G., Dement, J. M., Wagoner, J. K., & Froines, J. R. (1979). Mortality patterns among miners and millers of non-asbestiform talc: preliminary report. Journal of environmental pathology and toxicology, 2(5), 273-284.	Vermont, USA	Retrospective Cohort	392 talc workers followed for cause of death from 1940 to 1975.	White male talc workers at five companies who had participated in a Vermont Health Department radiographic survey for workers in dusty trades. Additional inclusion criteria included working in the Vermont talc industry between 1940 and 1969 for a minimum of one year.	Respiratory Malignant Neoplasms	Total Cohort		6	3.69	NR	No mention of mesothelioma in the study.
								Millers		2	1.96	NR
								Miners		5	1.15	NR (p < 0.05)
Fordyce	2019	Fordyce, T. A., Leonhard, M. J., Mowat, F. S., & Moolgavkar, S. H. (2019). A 37-year update on mortality patterns in an expanded cohort of Vermont talc miners and millers. Journal of occupational and environmental medicine, 61(11), 916-923.	Vermont, USA	Retrospective Cohort	427 talc workers followed for cause of death from 1930-2012	White male talc workers who had participated in a Vermont Health Department radiographic survey for workers in dusty trades. Additional inclusion criteria included working in the Vermont talc industry for at least one year from 1930 to 1940 or from 1970 to 1983.	Bronchus, Trachea, Lung	Total Cohort	SMR	32	NR	1.439 (0.984-2.031)	No death from malignant neoplasms of the pleura or peritoneum based on original cohort methods as described in Selevan et al. 1979. Using expanded subset of ICD codes (not applied to external reference population) one case of mesothelioma was identified.
								Latency (years): 0 - 14		1	NR	0.876 (0.022-4.88)
								Latency (years): 15 - 29		7	NR	1.706 (0.686-3.515)
								Latency (years): 30+		24	NR	1.412 (0.905-2.101)
								Length of Employment (years): 0-4		18	NR	1.51 (0.895-2.387)
								Length of Employment (years): 5-14		9	NR	1.477 (0.675-2.804)
								Length of Employment (years):15-29		3	NR	0.926 (0.191-2.707)
								Length of Employment (years): 30+		2	NR	2.024 (0.245-7.311)
								Job Type - Miller		14	NR	1.426 (0.779-2.392)
								Job Type - Miner		14	NR	1.278 (0.699-2.145)
Rubino	1976	Rubino, G. F., Scansetti, G., Piolatto, G., & Romano, C. A. (1976). Mortality study of talc miners and millers. Journal of Occupational and Environmental Medicine, 18(3), 186-193.	Val Chisone, Italy	Retrospective Cohort	1784 talc miners and millers followed from 1921 to 1974.	Talc miners and millers who began work at the Val Chisone talc facilities between 1921 and 1950 and who had been employed for at least one year.	Malignant neoplasms: lung, bronchus, and trachea	Miners	SMR	9	19.7	0.46	0
								Millers		4	6.5	0.62
								Miners: Exposure Level 1		3	2.7	1.11
								Miners: Exposure Level 2		1	1.9	0.53
								Miners: Exposure Level 3		5	4.4	1.14
								Millers: Exposure Level 1		3	1.8	1.67
								Millers: Exposure Level 2		1	0.8	1.25
								Millers: Exposure Level 3		-	1.3	-
								Miners: Latency Years < 20 years		1	1.4	0.71
								Miners: Latency Years 20-40		6	14.2	0.42 p < 0.01
								Miners: Latency Years > 40		2	4.1	0.49
								Millers: Latency Years < 20 years		-	0.5	-
								Millers: Latency Years 20-40		1	1.5	0.67
								Millers: Latency Years > 40		3	4.5	0.67
							Malignant neoplasms: pleural (mesothelioma)	Miners		-	0.5	-
								Millers		-	0.5	-
								Miners: Exposure Level 1		-	-	-
								Miners: Exposure Level 2		-	-	-
								Miners: Exposure Level 3		-	-	-
								Millers: Exposure Level 1		-	-	-
								Millers: Exposure Level 2		-	-	-
								Millers: Exposure Level 3		-	-	-
Rubino	1979	Rubino, G. F., Scansetti, G., Piolatto, G., & Gay, G. (1979). Mortality and morbidity among talc miners and millers in Italy. Dusts and disease, 357-363.	Val Chisone, Italy	Retrospective Cohort	See Rubino et al. 1976- Excluded since it was same cohort and only difference was external reference population.
Coggiola	2003	Coggiola, M., Bosio, D., Pira, E., Piolatto, P. G., Vecchia, C. L., Negri, E., ... & Bacaloni, A. (2003). An update of a mortality study of talc miners and millers in Italy. American journal of industrial medicine, 44(1), 63-69.	Val Chisone, Italy	Retrospective Cohort	1795 talc miners and millers followed from 1946 to 1995.	Talc miners and millers who were employed for at least one year between 1946 and 1995.	Lung	Total Cohort	SMR	44	46.9	0.938 (0.681-1.259)	0
								Miners		33	30.9	1.067 (0.734-1.499)
								Millers		11	16	0.688 (0.343-1.23)
								Duration of Exposure (years): < 10		15	-	1.358 (0.759-2.239)
								Duration of Exposure (years): 10-19		6	-	0.667 (0.244-1.453)
								Duration of Exposure (years): 20-29		15	-	0.941 (0.526-1.552)
								Duration of Exposure (years): 30 or more		8	-	0.732 (0.315-1.442)
							Pleura	Total Cohort		0	1.8	0 (0-2.069)
								Miners		0	1.2	0 (0-3.12)
								Millers		0	0.6	0 (0-6.146)
							Peritoneum	Total Cohort		0	0.9	0 (0-3.938)
								Miners		0	0.6	0 (0-5.996)
								Millers		0	0.3	0 (0-11.471)
Pira	2017	Pira, E., Coggiola, M., Ciocan, C., Romano, C., La Vecchia, C., Pelucchi, C., & Boffetta, P. (2017). Mortality of talc miners and millers from Val Chisone, Northern Italy: an updated cohort study. Journal of occupational and environmental medicine, 59(7), 659-664.	Val Chisone, Italy	Retrospective Cohort	1722 (1166 miners and 556 millers) followed from 1946 to 2013.	Talc miners and millers employed in asbestos-free talc mine from 1946 to 1995. Additional inclusion criteria included valid DOB, date of first and last employment, date of death, and at least 1 month of employment after January 1, 1946.	Lung	Total Cohort		75	72.6	1.03 (0.81-1.30)	0 (the two deaths from peritoneal cancer were from neoplasms other than the mesothelium)
								Miners		52	48.6	1.07 (0.80-1.40)
								Millers		23	23.9	0.96 (0.61-1.44)
								Duration of employment (years): < 15		29	-	1.14 (0.77-1.64)
								Duration of employment (years): 15-24		14	-	0.76 (0.41-1.27)
								Duration of employment (years): 25+		32	-	1.12 (0.76-1.58)
							Pleural	Total Cohort		0	2	0 (0-1.84)
							Peritoneal	Total Cohort		2	1.4	1.38 (0.17-4.97)
Ciocan	2021	Ciocan, C., Pira, E., Coggiola, M., Franco, N., Godono, A., La Vecchia, C., ... & Boffetta, P. (2022). Mortality in the cohort of talc miners and millers from Val Chisone, Northern Italy: 74 years of follow-up. Environmental Research, 203, 111865.	Val Chisone, Italy	Retrospective Cohort	1749 male talc workers followed from 1946 to 2020.	Talc miners and millers employed in asbestos-free talc mine from 1946 to 1995.	Lung	Total Cohort	SMR	85	83	1.02 (0.82-1.27)	0 (the two deaths from peritoneal cancer were from neoplasms other than the mesothelium)
								Miners		56	55.7	1.01 (0.76-1.31)
								Millers		29	27.3	1.06 (0.71-1.52)
								Duration of employment (years): < 15		31	-	1.03 (0.70-1.46)
								Duration of employment (years): 15-24		18	-	0.87 (0.52-1.38)
								Duration of employment (years): 25+		36	-	1.12 (0.78-1.55)
							Pleural	Total Cohort		0	2.8	-
							Peritoneal	Total Cohort		2	1.4	1.43 (0.17-5.15)
Wergeland	1990	Wergeland, E., Andersen, A., & Berheim, A. (1990). Morbidity and mortality in talc‐exposed workers. American journal of industrial medicine, 17(4), 505-513.	Altermark Talc Mine and Knarrevik Talc Mill, Norway	Retrospective Cohort	389 talc miners and millers followed from 1953 to 1987.	All employees from the mine who worked at least one year between 1944 to 1972; all employees from the mill who worked at least two years between 1935 to 1972.	Lung	Total Cohort	SIR	6	6.49	0.92 (0.34-2.01)	Mesothelioma was not recorded as a cause of death among cohort members.
								Miners		2	1.27	NR
								Millers		4	5.22	NR
								Duration of Employment (years): 1-4		0	1.23	NR
								Duration of Employment (years): 5-19		3	2.91	NR
								Duration of Employment (years): 20+		3	2.35	NR
								Years since first exposure (years): 1-19		2	1.75	NR
								Years since first exposure (years): 20-29		1	2.01	NR
								Years since first exposure (years): 30+		3	2.73	NR
Wergeland	2017	Wergeland, E., Gjertsen, F., Vos, L., & Grimsrud, T. K. (2017). Cause‐specific mortality and cancer morbidity in 390 male workers exposed to high purity talc, a six‐decade follow‐up. American journal of industrial medicine, 60(9), 821-830.	Altermark Talc Mine and Knarrevik Talc Mill, Norway	Retrospective Cohort	390 talc miners and millers followed from 1953 to 2011.	See Wergeland et al. 1990	Lung	Total Cohort	SIR	21	17.9	1.17 (0.73-1.79)	No case of mesothelioma or cancer of the pleura or peritoneum.
								Miners		4	3.9	1.04 (0.28-2.65)
								Millers		17	14.1	1.21 (0.70-1.94)
								<10 years employment, <20 years since first employment		1	0.49	2.04 (0.05-11.4)
								<10 years employment, >20 years since first employment		6	4.46	1.35 (0.49-2.93)
								10 or more years of employment, <20 years since first employment		1	1.06	0.95 (0.02-5.27)
								10 or more years of employment, >20 years since first employment		7	8.02	0.87 (0.35-1.80)
Wild	2002	Wild, P., Leodolter, K., Refregier, M., Schmidt, H., Zidek, T., & Haidinger, G. (2002). A cohort mortality and nested case-control study of French and Austrian talc workers. Occupational and environmental medicine, 59(2), 98-105.	France	Retrospective Cohort	1070 talc miners and miller followed from 1945 to 1994.	All male workers who worked continuously for at least one year between 1945 and 1994	Lung	Total Cohort	SMR	21	17	1.23 (0.76-1.89)	No case of mesothelioma or cancer of the pleura or peritoneum.
							Mesothelioma	Total Cohort		0	0.3	-
			Austria		542 talc miners and millers followed from 1972 to 1995.	All male workers who worked continuously for at least one year between 1972 and 1995	Lung	Total Cohort	SMR	7	6.6	1.06 (0.43-2.19)
							Mesothelioma	Total Cohort		0	0.1	-
